# Supplementary material for: Multi-omics Analysis of Periodontal Pocket Microbial Communities Pre- and Posttreatment
Source: PubMed Central journal article supplement (PMC5513737; doi:10.1128/msystems.00016-17), 2017-06-20
Supplement: sys003172112s6.pdf [file sys003172112s6.pdf]

## QIIME Analyses

### 16S Analysis

2 sequencing runs:

- 5/10/14
- 6/19/14

**Final mapping file to be used for ALL analyses:**  
**clorox\_perio\_map\_no\_dupl\_051115\_FIXED.txt**

For each folder, run `split_libraries_fastq.py` with R1 file (forward reads) as input (-i) and index file as -b.

Made shell script for each of these two sequencing runs with correct version of following `split_libraries` (demultiplexing) command & run on monsoon:

1: KC\_May2014.sh:

```
srun split_libraries_fastq.py -o /scratch-lt/kc2296/Periodontal_Data/16S_raw_data/slout/ -i /scratch-lt/kc2296/Periodontal_Data/16S_raw_data/051014_S0_L001_R1_001.fastq.gz -b /scratch-lt/kc2296/Periodontal_Data/16S_raw_data/051014_S0_L001_I1_001.fastq.gz --rev_comp_mapping_barcodes -m /scratch-lt/kc2296/Periodontal_Data/clorox_perio_map_no_dupl_051115_FIXED.txt
```

2: KC\_June2014.sh:

```
srun split_libraries_fastq.py -o /scratch-lt/kc2296/Periodontal_Data/16S_raw_data/slout/ -i /scratch-lt/kc2296/Periodontal_Data/16S_raw_data/6_19_14_S0_L001_R1_001.fastq.gz -b /scratch-lt/kc2296/Periodontal_Data/16S_raw_data/6_19_14_S0_L001_I1_001.fastq.gz --rev_comp_mapping_barcodes -m /scratch-lt/kc2296/Periodontal_Data/clorox_perio_map_no_dupl_051115_FIXED.txt
```

Next, did open reference OTU picking in iterative mode:

```
pick_open_reference_otus.py -i /scratch-lt/kc2296/Periodontal_Data/16S_data/slout_May/seqs.fna, /scratch-lt/kc2296/Periodontal_Data/16S_data/slout_June/seqs.fna -o /scratch-lt/kc2296/Periodontal_Data/16S_data/or_otus/ -a -O 24
```

**Summarize biom table & pick sampling depth:**

```
biom summarize-table -i otu_table_mc2_w_tax_no_pynast_failures.biom -o 16S_summary.txt
```

Will use **6628** as sampling depth.

Next: Core diversity analysis:

First: remove 1 sample from 1/8/13:

```
filter_samples_from_otu_table.py -i /scratch-  
lt/kc2296/Periodontal_Data/16S_data/or_otus/otu_table_mc2_w_tax_no_pynast_failures.biom -  
o /scratch-lt/kc2296/Periodontal_Data/16S_data/or_otus/16S_otu_table_NoJan.biom --  
sample_id_fp /scratch-lt/kc2296/Periodontal_Data/16S_data/or_otus/Jan_sampleID.txt --  
negate_sample_id_fp
```

the following is in 'KJC\_periodCD.sh' within /scratch-  
lt/kc2296/Periodontal\_Data/16S\_data/Core\_Diversity/:

```
srun core_diversity_analyses.py -i /scratch-  
lt/kc2296/Periodontal_Data/16S_data/or_otus/16S_otu_table_NoJan.biom -o /scratch-  
lt/kc2296/Periodontal_Data/16S_data/Core_Diversity/Results/ -e 6628 -m /scratch-  
lt/kc2296/Periodontal_Data/clorox_perio_map_no_dupl_051115_FIXED.txt -a -O 24 -t /scratch-  
lt/kc2296/Periodontal_Data/16S_data/or_otus/rep_set.tre
```

zip results:

```
tar -czf Core_Diversity_16S.tgz Results/
```

Evenly sampled biom table given as output from Core Diversity Analysis that will be used for all  
other downstream analysis: **table\_even6628.biom.gz**

→ unzipped: gunzip **table\_even6628.biom**

To get 16S bray curtis distance matrix:

```
beta_diversity_through_plots.py -i /scratch-  
lt/kc2296/Periodontal_Data/16S_data/or_otus/16S_otu_table_NoJan.biom -m /scratch-  
lt/kc2296/Periodontal_Data/16S_data/clorox_perio_map_no_dupl_051115_FIXED.txt -e 6628 -p  
/scratch-lt/kc2296/Periodontal_Data/Metabolite_Data/beta_diversity_params.txt -o /scratch-  
lt/kc2296/Periodontal_Data/16S_data/16S_bray_curtis_beta_div_results/
```

To get PCoA plot for pre-treatment individuals only:

```
filter_samples_from_otu_table.py -i 16S_otu_table_NoJan.biom -o  
16S_otu_table_NoJan_preTMTOnly.biom -m /scratch-  
lt/kc2296/Periodontal_Data/clorox_perio_map_no_dupl_051115_FIXED.txt -  
s 'TimePoint:1'
```

```
beta_diversity_through_plots.py -i  
16S_data/or_otus/16S_otu_table_NoJan_preTMTOnly.biom -m  
clorox_perio_map_no_dupl_051115_FIXED_preTMTOnly.txt -e 6628 -p
```

```
beta_diversity_params.txt -t 16S_data/or_otus/rep_set.tre -o
preTMT_beta_div/
```

zip results:

```
tar -czf PreTMT_Beta_Diversity_16S.tgz preTMT_beta_div/
```

clorox\_perio\_map\_no\_dupl\_051115\_FIXED\_preTMTOnly.txt

## **PA testing only**

-made mapping file with only 'pa' samples →

clorox\_perio\_map\_no\_dupl\_051115\_FIXED\_pa\_ONLY.txt

(\*had to remove one individual for which there were missing data ("NA") for DiseaseClass)

\*Cannot do paired diff testing w/only pa samples, because the only variable left (Disease class) is categorical

→ Core diversity with 'pa' samples only:

```
filter_samples_from_otu_table.py -i /scratch-
lt/kc2296/Periodontal_Data/16S_data/or_otus/16S_otu_table_NoJan.biom -
o /scratch-
lt/kc2296/Periodontal_Data/16S_data/or_otus/16S_pa_only.biom -m
/scratch-
lt/kc2296/Periodontal_Data/16S_data/clorox_perio_map_no_dupl_051115_FI
XED.txt -s 'SampleSite:pa'
```

### **□ Use 13501 for even sampling for this biom table**

```
core_diversity_analyses.py -i /scratch-
lt/kc2296/Periodontal_Data/16S_data/or_otus/16S_pa_only.biom -e 13501
-m /scratch-
lt/kc2296/Periodontal_Data/16S_data/clorox_perio_map_no_dupl_051115_FI
XED.txt -a -O 24 -t /scratch-
lt/kc2296/Periodontal_Data/16S_data/or_otus/rep_set.tre
```

zip results:

```
tar -czf Core_Diversity_pa_only.tgz pa_CoreDiv_Results/
```

## **Metabolite Analysis**

→ Most current metabolite 'OTU table' (i.e. bucket table) received from Neha 6 Feb 2015:

**Saliva\_Tooth.xls**

→ edited Sample IDs to match those in the mapping file as shown in [Metabolite Sample IDs](#) (Old Saliva Tooth file is saved on katy's computer as Saliva\_Tooth\_original\_IDs.txt\_

- added '#OTU\_ID' to cell A1
- OTUs/Metabolites will be problematic for QIIME
  - i.e.: 943.990-943.994 25-239, 944.990-945.000 25-239
- Replaced spaces with underscores and commas with semi-colons
- **Removed these two following sample IDs** from the OTU table ([Saliva\\_tooth.txt](#)), because Neha said they did not have seq data (emailed Scott 2x for confirmation, never heard back):
  - 12.2by\_3\_RA11\_01\_23904.mzXML
  - 19.3bx\_GC2\_01\_24036.mzXML
- Duplicate row in Saliva\_Tooth.xls:
  - 257.248-257.249\_593-596;\_258.251-258.253\_593-596: in cells 6232 **and** 6796: **DELETED row 6796**

New IDs & deleted samples saved to Saliva\_tooth.txt

Saliva\_tooth.txt was changed to a biom table and the name was altered:

```
biom convert -i Saliva_Tooth.txt -o Metabolite_OTU_table.biom --table-type="OTU table" --to-json
```

Pulled out all the samples from the earlier date (5/10/14): There is also 1 sample in this mapping file from 1/8/13; pulling that sample out as well.

-Seem to have trouble filtering by date, so made a list of June sample IDs, and filtered by that:

```
filter_samples_from_otu_table.py -i Metabolite_OTU_table.biom -o Metabolite_OTU_table_June_only.biom --sample_id_fp /scratch-It/kc2296/Periodontal_Data/Metabolite_Data/June_IDs.txt
```

```
biom summarize-table -i Metabolite_OTU_table_June_only.biom -o June_summ.txt
```

From this summary, chose even sampling depth as: 15743156 (lowest #)

### **Alpha Diversity analysis:**

```
alpha_diversity.ph -i /scratch-It/kc2296/Periodontal_Data/Metabolite_Data/Metabolite_OTU_table_June_only.biom -o Metabolite_Alpha_Diversity_Results -m observed_otus,shannon,simpson
```

### **Beta Diversity analysis:**

```
beta_diversity_through_plots.py -i /scratch-  
It/kc2296/Periodontal_Data/Metabolite_Data/Metabolite_OTU_table_June_only.biom -o  
Beta_plots -e 15643156 -m /scratch-  
It/kc2296/Periodontal_Data/16S_data/Metabolite_mapping_PairedDiffs_PC1noNA_noPA.txt -p  
beta_diversity_params.txt
```

```
beta_diversity_through_plots.py -i /scratch-  
It/kc2296/Periodontal_Data/Metabolite_Data/Metabolite_OTU_table_June_only.biom -o  
Metabolite_Beta_Diversity_Results -e 15743156 -m /scratch-  
It/kc2296/Periodontal_Data/16S_data/clorox_perio_map_no_dupl_051115_FIXED.txt -p  
beta_diversity_params.txt
```

```
beta_diversity_through_plots.py -i /scratch-  
It/kc2296/Periodontal_Data/Metabolite_Data/Metabolite_OTU_table_June_only.biom -o  
Metabolite_Beta_Diversity_Results -e 15743156 -m /scratch-  
It/kc2296/Periodontal_Data/16S_data/clorox_perio_map_no_dupl_051115_FIXED.txt -p  
beta_diversity_params.txt
```

### **Compare 16S vs metabolite hellinger distance matrices:**

-pull out saliva data first, from both 16S and metabolite data:

#### **16S:**

```
filter_distance_matrix.py -i /scratch-  
It/kc2296/Periodontal_Data/16S_data/16S_beta_hellinger_results/hellinger_dm.txt -m /scratch-  
It/kc2296/Periodontal_Data/16S_data/clorox_perio_map_no_dupl_051115_FIXED.txt -s  
"SampleSite:pa" --negate -o /scratch-  
It/kc2296/Periodontal_Data/16S_data/16S_hellinger_dm_noPA.txt
```

```
filter_distance_matrix.py -i /scratch-  
It/kc2296/Periodontal_Data/16S_data/16S_bray_curtis_beta_div_results/bray_curtis_dm.txt -m  
/scratch-It/kc2296/Periodontal_Data/16S_data/clorox_perio_map_no_dupl_051115_FIXED.txt -s  
"SampleSite:pa" --negate -o /scratch-  
It/kc2296/Periodontal_Data/16S_data/16S_bray_curtis_dm_noPA.txt
```

#### **Metabolite data:**

```
filter_distance_matrix.py -i /scratch-  
It/kc2296/Periodontal_Data/Metabolite_Data/Metabolite_Beta_Diversity_Results/bray_curtis_dm  
.txt -m /scratch-It/kc2296/Periodontal_Data/16S_data/clorox_perio_map_no_dupl_051115_FIXED.txt  
-s "SampleSite:pa" --negate -o /scratch-  
It/kc2296/Periodontal_Data/Metabolite_Data/Metabolite_bray_curtis_dm_noPA.txt
```

```
filter_distance_matrix.py -i /scratch-  
It/kc2296/Periodontal_Data/Metabolite_Data/Metabolite_Beta_Diversity_Hellinger_Results/hellin
```

```
ger_dm.txt -m /scratch-  
It/kc2296/Periodontal_Data/16S_data/clorox_perio_map_no_dupl_051115_FIXED.txt -s  
"SampleSite:pa" --negate -o /scratch-  
It/kc2296/Periodontal_Data/Metabolite_Data/Metabolite_Hellinger_dm_noPA.txt
```

Compare metabolite vs 16S, hellinger distance matrices:

```
compare_distance_matrices.py --method mantel -i /scratch-  
It/kc2296/Periodontal_Data/16S_data/16S_hellinger_dm_noPA.txt,/scratch-  
It/kc2296/Periodontal_Data/Metabolite_Data/Metabolite_Hellinger_dm_noPA.txt -o  
16s_metabolite_Hellinger_mantel_out -n 999
```

Compare metabolite vs 16S, bray curtis distance matrices:

```
compare_distance_matrices.py --method mantel -i /scratch-  
It/kc2296/Periodontal_Data/16S_data/16S_bray_curtis_dm_noPA.txt,/scratch-  
It/kc2296/Periodontal_Data/Metabolite_Data/Metabolite_bray_curtis_dm_noPA.txt -o  
16s_metabolite_BrayCurtis_mantel_out -n 999
```

## Results from both: 16S vs Metabolite Mantel results

**Do samples from the same individual cluster together?**

**First, remove 'pa'(saliva) samples from 16S unifracs distance matrices:**

```
unweighted unifracs: filter_distance_matrix.py -i /scratch-  
It/kc2296/Periodontal_Data/16S_data/Core_Diversity/Results/bdiv_even6628/unweighted_unifracs_dm  
.txt -m /scratch-  
It/kc2296/Periodontal_Data/16S_data/clorox_perio_map_no_dupl_051115_FIXED.txt -s  
"SampleSite:pa" --negate -o /scratch-  
It/kc2296/Periodontal_Data/16S_data/Core_Diversity/Results/bdiv_even6628/unweighted_unifracs_dm  
_noPA.txt
```

```
weighted unifracs: filter_distance_matrix.py -i /scratch-  
It/kc2296/Periodontal_Data/16S_data/Core_Diversity/Results/bdiv_even6628/weighted_unifracs_dm.tx  
t -m /scratch-It/kc2296/Periodontal_Data/16S_data/clorox_perio_map_no_dupl_051115_FIXED.txt -s  
"SampleSite:pa" --negate -o /scratch-  
It/kc2296/Periodontal_Data/16S_data/Core_Diversity/Results/bdiv_even6628/weighted_unifracs_dm_n  
oPA.txt
```

**Do samples from the same individual cluster together?**

```
unweighted unifracs: compare_categories.py -i /scratch-  
It/kc2296/Periodontal_Data/16S_data/Core_Diversity/Results/bdiv_even6628/unweighted_unifracs_dm  
_noPA.txt --method mrpp -m /scratch-
```

```
lt/kc2296/Periodontal_Data/16S_data/clorox_perio_map_no_dupl_051115_FIXED.txt -c individual
-o MRPP_unweighted_16S_out -n 999
```

**weighted unifrac:** compare\_categories.py -i /scratch-

```
lt/kc2296/Periodontal_Data/16S_data/Core_Diversity/Results/bdiv_even6628/weighted_unifrac_dm_n
oPA.txt --method mrpp -m /scratch-
```

```
lt/kc2296/Periodontal_Data/16S_data/clorox_perio_map_no_dupl_051115_FIXED.txt -c individual
-o MRPP_weighted_16S_out -n 999
```

### **Metabolite:**

compare\_categories.py -i /scratch-

```
lt/kc2296/Periodontal_Data/Metabolite_Data/Metabolite_bray_curtis_dm_noPA.txt --method
mrpp -m /scratch-
```

```
lt/kc2296/Periodontal_Data/16S_data/clorox_perio_map_no_dupl_051115_FIXED.txt -c individual
-o MRPP_Metabolite_out -n 999
```

### **SourceTracker Analysis**

-Filter out OTUs that are in < 1% of the samples:

```
filter_otus_from_otu_table.py -i /scratch-
```

```
lt/kc2296/Periodontal_Data/16S_data/Core_Diversity/Results/table_even6628.biom -o /scratch-
```

```
lt/kc2296/Periodontal_Data/16S_data/Core_Diversity/Results/filtered_1percent_otu_table.biom -s 3
```

Before: 284 samples; 32139 observations

After: 270 samples; 5987 observations

-Convert BIOM table to txt:

```
biom convert -i filtered_1percent_otu_table.biom -o filtered_1percent_otu_table.txt --table-type "OTU
table" --to-tsv
```

-Add 2 columns to mapping file for SourceTracker: "SourceSink" and "Env"

- Teeth as 'source'; saliva as 'sink'

- ENV = Description

Added new mapping file to monsoon: clorox\_perio\_map\_no\_dupl\_051115\_FIXED\_SourceTracker

### **Bacteria of interest from Karen:**

**paired difference testing w/genus level otu table**

**do w/just 7 indiv w/just these bacteria at the genus level**

1. Fusobacterium

```
k__Bacteria;p__Fusobacteria;c__Fusobacteriia;o__Fusobacteriales;f__Fusobacteriaceae;g__Fusobacterium
```

```
identify_paired_differences.py -m
```

```
clorox_perio_map_no_dupl_051115_FIXED_paired_diffs_SEVEN.txt -o
```

```
paired_diffs_specific_taxa/ -t TimePoint -s 'T1T3_samePocket:T' -x 1,3 --metadata_categories
"Fusobacterium" -c individual
```

Ten indivs:

```
identify_paired_differences.py -m  
clorox_perio_map_no_dupl_051115_FIXED_paired_diffs_taxa_TEN.txt -o  
paired_diffs_specific_taxa_ten_Fuso/ -t TimePoint -x 1,2 --metadata_categories  
"Fusobacterium" -c individual
```

Ten indivs, no PA:

```
identify_paired_differences.py -m  
clorox_perio_map_no_dupl_051115_FIXED_paired_diffs_taxa_TEN_noPA.txt -o  
paired_diffs_specific_taxa_ten_Fuso_noPA/ -t TimePoint -x 1,2 --metadata_categories  
"Fusobacterium" -c individual
```

## 2. Prevotella

```
k__Bacteria;p__Bacteroidetes;c__Bacteroidia;o__Bacteroidales;f__Prevotellaceae;g__Prevotella
```

```
identify_paired_differences.py -m clorox_perio_map_no_dupl_051115_FIXED_paired_diffs_SEVEN.txt -o  
paired_diffs_specific_taxa/ -t TimePoint -s 'T1T3_samePocket:T' -x 1,3 --metadata_categories  
"Prevotella" -c individual
```

Ten indivs:

```
identify_paired_differences.py -m  
clorox_perio_map_no_dupl_051115_FIXED_paired_diffs_taxa_TEN.txt -o  
paired_diffs_specific_taxa_ten_Prev/ -t TimePoint -x 1,2 --metadata_categories "Prevotella" -c  
individual
```

Ten indivs, no PA:

```
identify_paired_differences.py -m  
clorox_perio_map_no_dupl_051115_FIXED_paired_diffs_taxa_TEN_noPA.txt -o  
paired_diffs_specific_taxa_ten_Prev_noPA/ -t TimePoint -x 1,2 --metadata_categories  
"Prevotella" -c individual
```

## 3. Veillonella

```
k__Bacteria;p__Firmicutes;c__Clostridia;o__Clostridiales;f__Veillonellaceae;g__Veillonella
```

```
identify_paired_differences.py -m clorox_perio_map_no_dupl_051115_FIXED_paired_diffs_SEVEN.txt -o  
paired_diffs_specific_taxa/ -t TimePoint -s 'T1T3_samePocket:T' -x 1,3 --metadata_categories  
"Veillonella" -c individual
```

Ten indivs:

```
identify_paired_differences.py -m  
clorox_perio_map_no_dupl_051115_FIXED_paired_diffs_taxa_TEN.txt -o  
paired_diffs_specific_taxa_ten_Veill/ -t TimePoint -x 1,2 --metadata_categories "Veillonella" -c  
individual
```

Ten indivs, no PA:

```
identify_paired_differences.py -m  
clorox_perio_map_no_dupl_051115_FIXED_paired_diffs_taxa_TEN_noPA.txt -o  
paired_diffs_specific_taxa_ten_Veill_noPA/ -t TimePoint -x 1,2 --metadata_categories  
"Veillonella" -c individual
```

#### 4. Streptococcus

```
k__Bacteria;p__Firmicutes;c__Bacilli;o__Lactobacillales;f__Streptococcaceae;g__Streptococcus
```

```
identify_paired_differences.py -m clorox_perio_map_no_dupl_051115_FIXED_paired_diffs_SEVEN.txt -o  
paired_diffs_specific_taxa/ -t TimePoint -s 'T1T3_samePocket:T' -x 1,3 --metadata_categories  
"Streptococcus" -c individual
```

Ten indivs:

```
identify_paired_differences.py -m  
clorox_perio_map_no_dupl_051115_FIXED_paired_diffs_taxa_TEN.txt -o  
paired_diffs_specific_taxa_ten_Strep/ -t TimePoint -x 1,2 --metadata_categories "Streptococcus"  
-c individual
```

Ten indivs, no PA:

```
identify_paired_differences.py -m  
clorox_perio_map_no_dupl_051115_FIXED_paired_diffs_taxa_TEN_noPA.txt -o  
paired_diffs_specific_taxa_ten_Strep_noPA/ -t TimePoint -x 1,2 --metadata_categories  
"Streptococcus" -c individual
```

#### 5. Treponema

```
k__Bacteria;p__Spirochaetes;c__Spirochaetes;o__Spirochaetales;f__Spirochaetaceae;g__Treponema
```

```
identify_paired_differences.py -m clorox_perio_map_no_dupl_051115_FIXED_paired_diffs_SEVEN.txt -o  
paired_diffs_specific_taxa/ -t TimePoint -s 'T1T3_samePocket:T' -x 1,3 --metadata_categories  
"Treponema" -c individual
```

Ten indivs:

```
identify_paired_differences.py -m  
clorox_perio_map_no_dupl_051115_FIXED_paired_diffs_taxa_TEN.txt -o  
paired_diffs_specific_taxa_ten_Trep/ -t TimePoint -x 1,2 --metadata_categories "Treponema" -c  
individual
```

Ten indivs, no PA:

```
identify_paired_differences.py -m  
clorox_perio_map_no_dupl_051115_FIXED_paired_diffs_taxa_TEN_noPA.txt -o  
paired_diffs_specific_taxa_ten_Trep_noPA/ -t TimePoint -x 1,2 --metadata_categories  
"Treponema" -c individual
```

## 6. Porphyromonas

k\_\_Bacteria;p\_\_Bacteroidetes;c\_\_Bacteroidia;o\_\_Bacteroidales;f\_\_Porphyromonadaceae;g\_\_Porphyromonas

```
identify_paired_differences.py -m clorox_perio_map_no_dupl_051115_FIXED_paired_diffs_SEVEN.txt -o  
paired_diffs_specific_taxa/ -t TimePoint -s 'T1T3_samePocket:T' -x 1,3 --metadata_categories  
"Porphyromonas" -c individual
```

Ten indivs:

```
identify_paired_differences.py -m  
clorox_perio_map_no_dupl_051115_FIXED_paired_diffs_taxa_TEN.txt -o  
paired_diffs_specific_taxa_ten_Porph/ -t TimePoint -x 1,2 --metadata_categories  
"Porphyromonas" -c individual
```

Ten indivs, no PA:

```
identify_paired_differences.py -m  
clorox_perio_map_no_dupl_051115_FIXED_paired_diffs_taxa_TEN_noPA.txt -o  
paired_diffs_specific_taxa_ten_Porph_noPA/ -t TimePoint -x 1,2 --metadata_categories  
"Porphyromonas" -c individual
```

## 7. Selenomonas

k\_\_Bacteria;p\_\_Firmicutes;c\_\_Clostridia;o\_\_Clostridiales;f\_\_Veillonellaceae;g\_\_Selenomonas

```
identify_paired_differences.py -m clorox_perio_map_no_dupl_051115_FIXED_paired_diffs_SEVEN.txt -o  
paired_diffs_specific_taxa/ -t TimePoint -s 'T1T3_samePocket:T' -x 1,3 --metadata_categories  
"Selenomonas" -c individual
```

Ten indivs:

```
identify_paired_differences.py -m  
clorox_perio_map_no_dupl_051115_FIXED_paired_diffs_taxa_TEN.txt -o  
paired_diffs_specific_taxa_ten_Selen/ -t TimePoint -x 1,2 --metadata_categories "Selenomonas"  
-c individual
```

Ten indivs, no PA:

```
identify_paired_differences.py -m  
clorox_perio_map_no_dupl_051115_FIXED_paired_diffs_taxa_TEN_noPA.txt -o  
paired_diffs_specific_taxa_ten_Selen_noPA/ -t TimePoint -x 1,2 --metadata_categories  
"Selenomonas" -c individual
```

## 8. Leptotrichia

k\_\_Bacteria;p\_\_Firmicutes;c\_\_Clostridia;o\_\_Clostridiales;f\_\_Veillonellaceae;g\_\_Selenomonas

```
identify_paired_differences.py -m clorox_perio_map_no_dupl_051115_FIXED_paired_diffs_SEVEN.txt -o  
paired_diffs_specific_taxa/ -t TimePoint -s 'T1T3_samePocket:T' -x 1,3 --metadata_categories  
"Leptotrichia" -c individual
```

```
identify_paired_differences.py -m  
clorox_perio_map_no_dupl_051115_FIXED_paired_diffs_taxa_TEN.txt -o  
paired_diffs_specific_taxa_ten_Lepto/ -t TimePoint -x 1,2 --metadata_categories "Leptotrichia" -c  
individual
```

Ten indivs, no PA:

```
identify_paired_differences.py -m  
clorox_perio_map_no_dupl_051115_FIXED_paired_diffs_taxa_TEN_noPA.txt -o  
paired_diffs_specific_taxa_ten_Lepto_noPA/ -t TimePoint -x 1,2 --metadata_categories  
"Leptotrichia" -c individual
```

#### 9. Synergistes: Genus not in our data

#### 10. Tannerella

```
k__Bacteria;p__Bacteroidetes;c__Bacteroidia;o__Bacteroidales;f__Porphyromonadaceae;g__Tannerella
```

```
identify_paired_differences.py -m clorox_perio_map_no_dupl_051115_FIXED_paired_diffs_SEVEN.txt -o  
paired_diffs_specific_taxa/ -t TimePoint -s 'T1T3_samePocket:T' -x 1,3 --metadata_categories  
"Tannerella" -c individual
```

```
identify_paired_differences.py -m  
clorox_perio_map_no_dupl_051115_FIXED_paired_diffs_taxa_TEN.txt -o  
paired_diffs_specific_taxa_ten_Tann/ -t TimePoint -x 1,2 --metadata_categories "Tannerella" -c  
individual
```

Ten indivs, no PA:

```
identify_paired_differences.py -m  
clorox_perio_map_no_dupl_051115_FIXED_paired_diffs_taxa_TEN_noPA.txt -o  
paired_diffs_specific_taxa_ten_Tann_noPA/ -t TimePoint -x 1,2 --metadata_categories  
"Tannerella" -c individual
```

Treatment individuals only:

```
identify_paired_differences.py -m  
clorox_perio_map_no_dupl_051115_FIXED_paired_diffs_taxa_FIVE_PD_no_missing.txt -o  
paired_diffs_specific_taxa_Tann_noPA_tmt_only/ -t TimePoint -x 1,2 --metadata_categories  
"Tannerella" -c individual
```

#### 11. Bacteroidetes

```
k__Bacteria;p__Bacteroidetes;c__Bacteroidia;o__Bacteroidales;f__Bacteroidaceae;g__Bacteroides
```

```
identify_paired_differences.py -m clorox_perio_map_no_dupl_051115_FIXED_paired_diffs_SEVEN.txt -o  
paired_diffs_specific_taxa/ -t TimePoint -s 'T1T3_samePocket:T' -x 1,3 --metadata_categories  
"Bacteroidetes" -c individual
```

```
identify_paired_differences.py -m  
clorox_perio_map_no_dupl_051115_FIXED_paired_diffs_taxa_TEN.txt -o  
paired_diffs_specific_taxa_ten_Bact/ -t TimePoint -x 1,2 --metadata_categories "Bacteroidetes" -  
c individual
```

Ten indivs, no PA:

```
identify_paired_differences.py -m  
clorox_perio_map_no_dupl_051115_FIXED_paired_diffs_taxa_TEN_noPA.txt -o  
paired_diffs_specific_taxa_ten_Bact_noPA/ -t TimePoint -x 1,2 --metadata_categories  
"Bacteroidetes" -c individual
```

```
identify_paired_differences.py -m  
clorox_perio_map_no_dupl_051115_FIXED_paired_diffs_taxa_TEN.txt -o  
paired_diffs_specific_taxa_ten_Desulf/ -t TimePoint -x 1,2 --metadata_categories "Desulfovibrio" -  
c individual
```

Ten indivs, no PA:

```
identify_paired_differences.py -m  
clorox_perio_map_no_dupl_051115_FIXED_paired_diffs_taxa_TEN_noPA.txt -o  
paired_diffs_specific_taxa_ten_Desulf_noPA/ -t TimePoint -x 1,2 --metadata_categories  
"Desulfovibrio" -c individual
```

```
identify_paired_differences.py -m  
clorox_perio_map_no_dupl_051115_FIXED_paired_diffs_SEVEN_d_noPA.txt -o  
paired_diffs_specific_taxa_7_Fuso_noPA/ -t TimePoint -s 'T1T3_samePocket:T' -x 1,3 --  
metadata_categories "Fusobacterium" -c individual
```

```
identify_paired_differences.py -m  
clorox_perio_map_no_dupl_051115_FIXED_paired_diffs_SEVEN_d_noPA.txt -o  
paired_diffs_specific_taxa_7_Prev_noPA/ -t TimePoint -s 'T1T3_samePocket:T' -x 1,3 --  
metadata_categories "Prevotella" -c individual
```

```
identify_paired_differences.py -m  
clorox_perio_map_no_dupl_051115_FIXED_paired_diffs_SEVEN_d_noPA.txt -o  
paired_diffs_specific_taxa_7_Veill_noPA/ -t TimePoint -s 'T1T3_samePocket:T' -x 1,3 --  
metadata_categories "Veillonella" -c individual
```

```
identify_paired_differences.py -m  
clorox_perio_map_no_dupl_051115_FIXED_paired_diffs_SEVEN_d_noPA.txt -o  
paired_diffs_specific_taxa_7_strep_noPA/ -t TimePoint -s 'T1T3_samePocket:T' -x 1,3 --  
metadata_categories "Streptococcus" -c individual
```

```
identify_paired_differences.py -m
clorox_perio_map_no_dupl_051115_FIXED_paired_diffs_SEVEN_d_noPA.txt -o
paired_diffs_specific_taxa_trep_noPA/ -t TimePoint -s 'T1T3_samePocket:T' -x 1,3 --
metadata_categories "Treponema" -c individual
```

```
identify_paired_differences.py -m
clorox_perio_map_no_dupl_051115_FIXED_paired_diffs_SEVEN_d_noPA.txt -o
paired_diffs_specific_taxa_7_porph_noPA/ -t TimePoint -s 'T1T3_samePocket:T' -x 1,3 --
metadata_categories "Porphyromonas" -c individual
```

```
identify_paired_differences.py -m
clorox_perio_map_no_dupl_051115_FIXED_paired_diffs_SEVEN_d_noPA.txt -o
paired_diffs_specific_taxa_7_Selen_noPA/ -t TimePoint -s 'T1T3_samePocket:T' -x 1,3 --
metadata_categories "Selenomonas" -c individual
```

```
identify_paired_differences.py -m
clorox_perio_map_no_dupl_051115_FIXED_paired_diffs_SEVEN_d_noPA.txt -o
paired_diffs_specific_taxa_7_lepto_noPA/ -t TimePoint -s 'T1T3_samePocket:T' -x 1,3 --
metadata_categories "Leptotrichia" -c individual
```

```
identify_paired_differences.py -m
clorox_perio_map_no_dupl_051115_FIXED_paired_diffs_SEVEN_d_noPA.txt -o
paired_diffs_specific_taxa_7_tann_noPA/ -t TimePoint -s 'T1T3_samePocket:T' -x 1,3 --
metadata_categories "Tannerella" -c individual
```

```
identify_paired_differences.py -m
clorox_perio_map_no_dupl_051115_FIXED_paired_diffs_SEVEN_d_noPA.txt -o
paired_diffs_specific_taxa_7_bact_noPA/ -t TimePoint -s 'T1T3_samePocket:T' -x 1,3 --
metadata_categories "Bacteroidetes" -c individual
```

```
identify_paired_differences.py -m
clorox_perio_map_no_dupl_051115_FIXED_paired_diffs_SEVEN_d_noPA.txt -o
paired_diffs_specific_taxa_7_defulf_noPA/ -t TimePoint -x 1,2 --metadata_categories
"Desulfovibrio" -c individual
```

pre-treatment only:

-mantel: unifrac vs. pocket depth / max pd

### **MaxPD:**

```
distance_matrix_from_mapping.py -i
clorox_perio_map_no_dupl_051115_FIXED_no_MaxPD_NAs.txt -o Max_PD_dm.txt -c Max_PD
```

```
filter_distance_matrix.py -i Max_PD_dm.txt -o Max_PD_dm_PreTMTonly.txt -m
clorox_perio_map_no_dupl_051115_FIXED_noNA.txt -s 'TimePoint:1'
```

Unweighted unifrac:

```
compare_distance_matrices.py --method mantel -i
MaxPD_core_div/bdiv_even6628/unweighted_unifrac_dm.txt,Max_PD_dm
_PreTMOnly.txt -o mantel_out_MaxPD_unw -n 9999
→ non-significant
```

Weighted unifrac:

```
compare_distance_matrices.py --method mantel -i
MaxPD_core_div/bdiv_even6628/weighted_unifrac_dm.txt,Max_PD_dm_P
reTMOnly.txt -o mantel_out_MaxPD_wtd -n 9999
→ non-significant
```

### **PocketDepth:**

```
distance_matrix_from_mapping.py -i
clorox_perio_map_no_dupl_051115_FIXED_noPD_NAs.txt -o PD_dm.txt -c PocketDepth
```

```
filter_distance_matrix.py -i PD_dm.txt -o PD_dm_PreTMOnly.txt -m
clorox_perio_map_no_dupl_051115_FIXED_noPD_NAs.txt -s 'TimePoint:1'
```

Unweighted unifrac:

```
compare_distance_matrices.py --method mantel -i
/Users/katycaliff/Documents/Periodontal_data/16S_data/PD_dm_PreT
MOnly.txt,unweighted_unifrac_dm.txt -o mantel_out_PD_unw -n
9999
→ non-significant
```

Weighted unifrac:

```
compare_distance_matrices.py --method mantel -i
/Users/katycaliff/Documents/Periodontal_data/16S_data/PD_dm_PreT
MOnly.txt,weighted_unifrac_dm.txt -o mantel_out_PD_wtd -n 9999
→ non-significant
```
