# Supplementary material for: Multi-omics Analysis of Periodontal Pocket Microbial Communities Pre- and Posttreatment
Source: PubMed Central journal article supplement (PMC5513737; doi:10.1128/msystems.00016-17), 2017-06-20
Supplement: sys003172112s7.pdf [file sys003172112s7.pdf]

## Metagenomic Data Analysis Commands.

List of commands:

1. Each metagenome was run through KneadData to filter out human contamination in this fashion:  

```
kneaddata --input sample1.fastq --reference-db Homo_sapiens_Bowtie2_v0.1 --output sample1_kneaded
```
2. Each filtered metagenome was then run through HUMAnN2:  

```
humann2 --input sample1_kneaded/sample1_kneaddata.fastq --output sample1_humann2 --metaphlan metaphlan2/1.0 --output-format biom --remove-stratified-output --threads 5
```
3. All 3 biom file outputs (genefamilies, pathway abundance and pathway coverage) from the samples were then merged using QIIME's merge\_otu\_tables.py:  

```
merge_otu_tables.py -i sample1_humann2/sample1_genefamilies.biom,sample2_humann2/sample2_genefamilies.biom,...,sample23_humann2/sample23_genefamilies.biom -o genefamilies.biom
```
4. The biom files were converted to TSV format using biom tools:  

```
biom convert -i genefamilies.biom -o genefamilies.tsv --to-tsv --table-type="OTU table"
```
5. Each TSV file had float values converted to integers using code written by Lauren McIver at the Huttenhower lab:  

```
table_float_to_int.py -i genefamilies.tsv -o genefamilies_int.tsv
```
6. Each file was then converted back to biom format:  

```
biom convert -i genefamilies_int.tsv -o genefamilies_int.biom --to-json --table-type="OTU table"
```
7. After looking at the depth needed:  

```
biom summarize-table -i genefamilies_int.biom -o genefamily_int_summary.txt
```
8. The resulting files were then run through QIIME's core\_diversity\_analyses.py using the appropriate mapping file and depth (e) determined by the biom file summary:  

```
core_diversity_analyses.py -i genefamilies_int.biom -o core_diversity_genefamilies -m mapping.txt -e 1046761 --nonphylogenetic_diversity
```
