# Supplementary material for: Multi-omics Analysis of Periodontal Pocket Microbial Communities Pre- and Posttreatment
Source: PubMed Central journal article supplement (PMC5513737; doi:10.1128/msystems.00016-17), 2017-06-20
Supplement: sys003172112sf1.pdf [file sys003172112sf1.pdf]

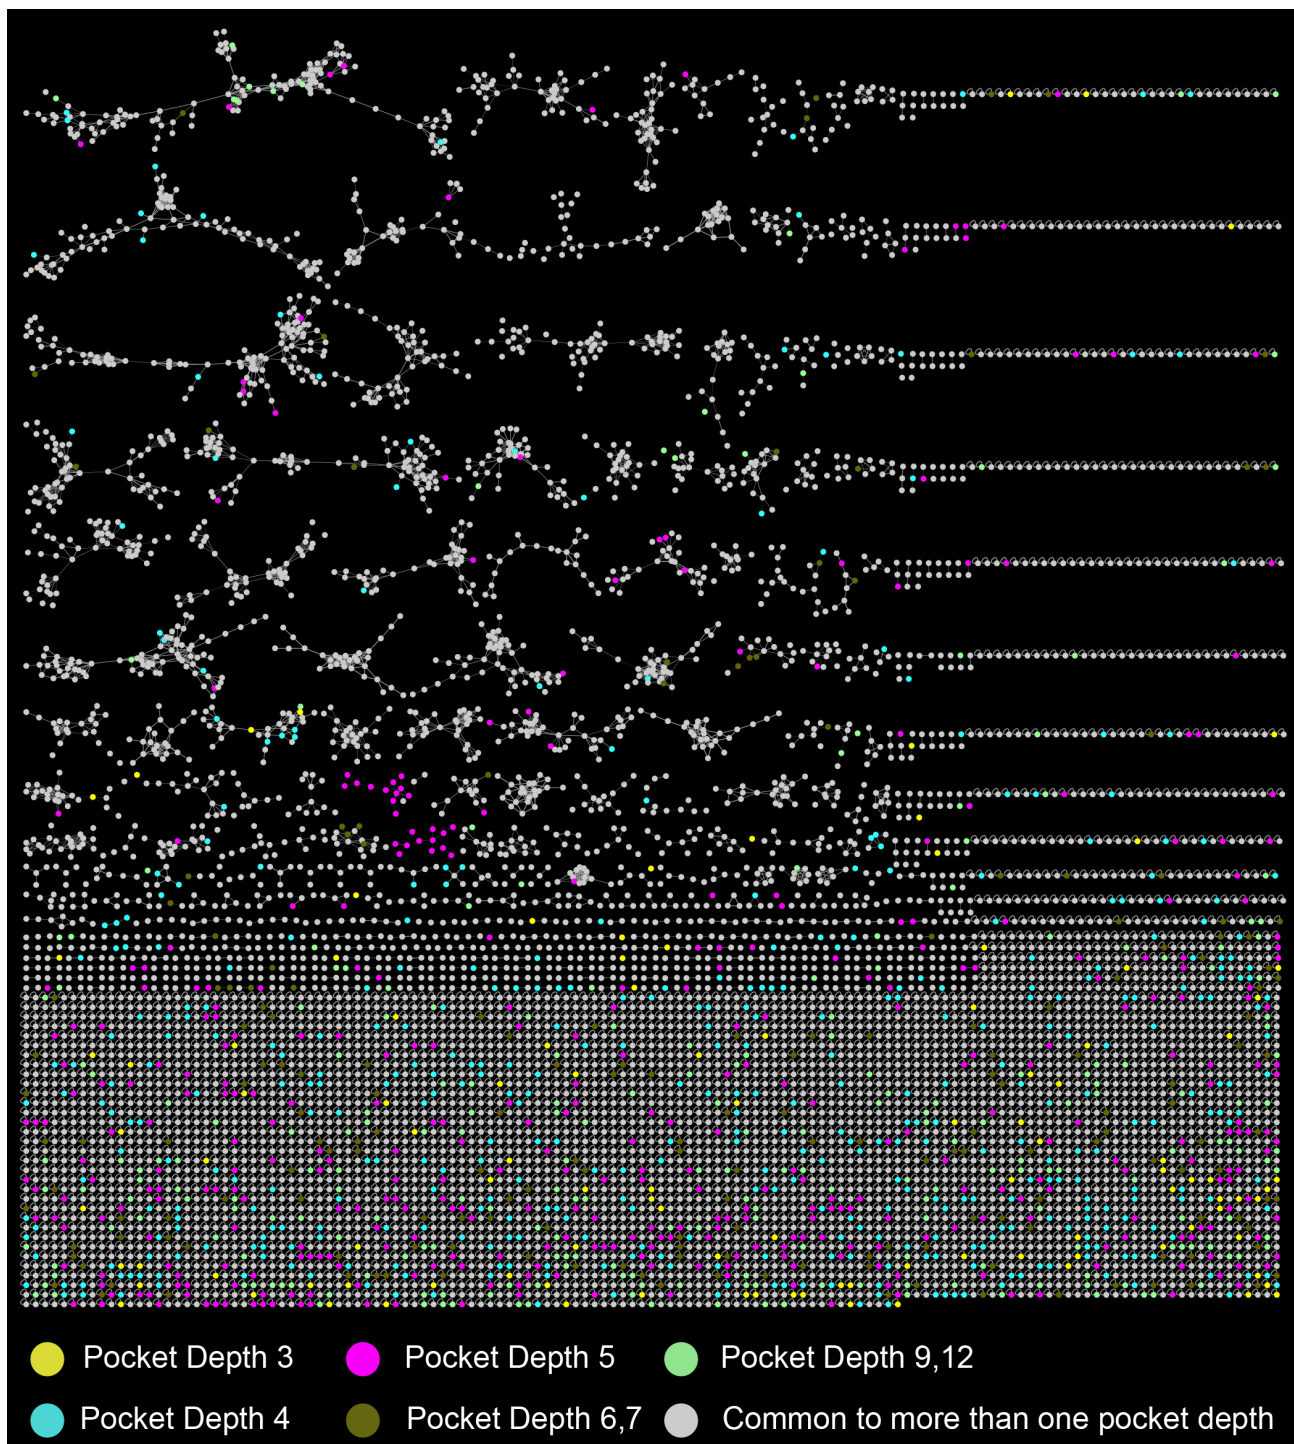

Figure S1
